# Supplementary material
Source: Elsevier journal article supplement (https://www.sciencedirect.com/science/article/pii/S021391111830178X)
Supplement: mmc1 [file S021391111830178X:mmc1.docx]

**Appendix**

**Figure I.** Flow diagram summarizing the research design.

Nationwide register of death certificates issued in Spain during period January to December 2015

N = 422,568

Population died of cancer

n = 111,064

Remove, patients under 26 years of age (342) and place of death unknown (4964)

n = 105,758

Lived in a municipality with more than 10,000 inhabitants

n = 79,506

Lived in a municipality with fewer than 10,000 inhabitants

n = 26,252

**Table I**

Estimation results using a multinomial logit specification

| **Variables** | **Home (ref. hospital)**  **Coef. (SE)** | **LTCC (ref. hospital)**  **Coef. (SE)** |
| --- | --- | --- |
| Age | −0.0583 (0.0062)a | −0.0344 (0.0120)a |
| Age 2 | 0.0006 (0.00004)a | 0.0007 (0.0001)a |
| Primary education  Secondary education  University education | 0.0558 (0.0234)b  0.1238 (0.0339)a  0.2966 (0.0314)a | −0.1436 (0.0358)a  −0.2218 (0.0571)a  −0.3617 (0.0550)a |
| Married | 0.1617 (0.0323)a | −1.3863 (0.0442)a |
| Widowed | 0.0662 (0.0356)c | −0.8575 (0.0455)a |
| Divorced | -0.1550 (0.0508)a | −0.4491 (0.0706)a |
| Female | 0.1796 (0.0187)a | 0.1031 (0.0309)a |
| Cancer haematological | −0.5523 (0.0357)a | −0.3851 (0.0550)a |
| Dummy for palliative service only in hospital | −0.1940 (0.0399)a | −0.1007 (0.0631) |
| Dummy for no access to palliative care at home | −0.1017 (0.0492)b | −0.279 (0.1063)a |
| Dummy for palliative service in LTCC | 0.0901 (0.0240)a | 0.0192 (0.0402) |
| Dummy for palliative service only in LTCC | −0.1399 (0.2356) | 0.9674 (0.3061)a |
| Social security affiliates in agriculture (%) | 0.0097 (0.0012)a | −0.0086 (0.0032)a |
| Andalusia (ref.) |  |  |
| Galicia | 0.0890 (0.0407)b | −0.1982 (0.0929)b |
| Catalonia | −0.4011 (0.0353)a | 1.6356 (0.0614)a |
| Basque Country | −0.0865 (0.0437)b | 0.3223 (0.0843)a |
| Madrid | −0.5011 (0.0367)a | 0.2111 (0.0701)a |
| Valencia | 0.3291 (0.0312)a | −0.0535 (0.0763) |
| Canary Islands | −0.7217 (0.0578)a | −1.0103 (0.1451)a |
| The coefficients of other autonomous communities are omitted from the table | …………………. | ………………. |
| Dummy for capital of province or island | −0.1415 (0.0222)a | 0.0545 (0.0380) |
| Constant | −0.3129 (0.2185) | −2.9915 (0.4487)a |
| Pseudo R2 | 0.0876 | |
| N | 79,506 | |

LTCC: long-term care centre; SE: standard error.

ap <0.01.

bp <0.05.
